# Supplementary material for: High Efficiency Drug Repurposing Design for New Antifungal Agents
Source: PubMed Central journal article supplement (PMC6632159; doi:10.3390/mps2020031), 2019-04-17
Supplement: mps-02-00031-s001.pdf [file mps-02-00031-s001.pdf]

## SUPPLEMENTARY TABLES

**Table S1.** Pharmacology of repositioned compounds.

| Compounds                                                                                                   | Pharmacology                                                                                                                                                                                                                                                                                                                                                                                                                  |
|-------------------------------------------------------------------------------------------------------------|-------------------------------------------------------------------------------------------------------------------------------------------------------------------------------------------------------------------------------------------------------------------------------------------------------------------------------------------------------------------------------------------------------------------------------|
| <p>Bithionol [18]</p> 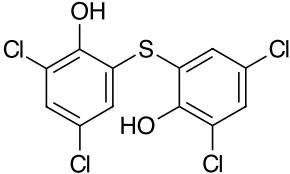     | <ul style="list-style-type: none"> <li>• Halogenated anti-infective agent that is used against trematode and cestode infestations.</li> <li>• Inhibits human soluble adenylyl cyclase</li> </ul>                                                                                                                                                                                                                              |
| <p>Tacrolimus [19]</p>    | <ul style="list-style-type: none"> <li>• Inhibits calcineurin phosphatase activity, thus decreases cytokine production.</li> <li>• Exhibits immunosuppressive activity (more potent than cyclosporine).</li> <li>• Prevents T-lymphocyte activation in response to antigenic or mitogenic stimulation.</li> </ul>                                                                                                             |
| <p>Floxuridine [20]</p>  | <ul style="list-style-type: none"> <li>• Fluorinated pyrimidine monophosphate analog of 5-fluoro-2'-deoxyuridine-5'-phosphate (FUDR-MP) with antineoplastic activity.</li> <li>• Inhibits thymidylate synthase, thus disrupting DNA synthesis.</li> <li>• Fluorouracil, the metabolized product, incorporates into RNA, which prevents the utilization of uracil in RNA synthesis.</li> </ul>                                 |
| <p>Auranofin [21]</p>    | <ul style="list-style-type: none"> <li>• Inhibits the activity of mitochondrial thioredoxin reductase (TrxR) by interacting with selenocysteine within the redox-active domain.</li> <li>• Induces mitochondrial oxidative stress, thus resulting in the induction of apoptosis.</li> <li>• Inhibits the JAK1/STAT3 signaling pathway, hence suppresses the expression of immune factors involved in inflammation.</li> </ul> |

---

Drospirenone [22]

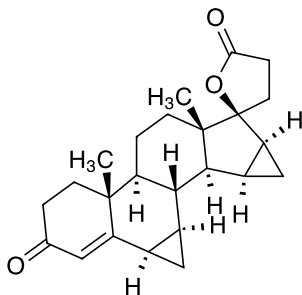

- Possesses progestational and anti-mineralocorticoid activity.
- Binds to the progesterone receptor, resulting in a suppression/inhibition of LH activity and ovulation (oral contraceptive).

---

Perhexiline [23]

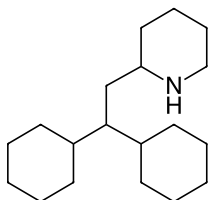

- Binds to the mitochondrial enzyme carnitine palmitoyltransferase (CPT)-1 and CPT-2.
- Shifts myocardial substrate utilization, viz., shifting from long chain fatty acids to carbohydrates via the inhibition of CPT-1 and CPT-2, thus used for the therapy in patients with ischaemia.
- May cause neuropathy and hepatitis.

---

Toremifene [24]

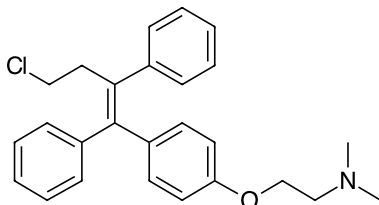

- Selectively modulates estrogen receptors by competitively binds to the receptors, thus interferes with estrogen activity.

---

Aspirin  
(Acetylsalicylic acid) [25]

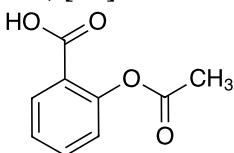

- Non-steroidal anti-inflammatory agent.
- Binds to/acetylates serine residues in cyclooxygenases.
- Decreased synthesis of prostaglandin, platelet aggregation, and inflammation.

---

Ibuprofen [26]

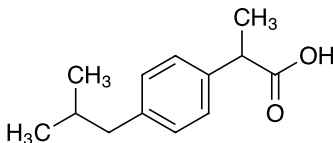

- An anti-inflammatory drug possessing anti-inflammatory, analgesic, and antipyretic activities.
- Inhibits cyclo-oxygenase I and II, thus results in a decreased prostaglandin synthesis.

---

Human glycogen synthase kinase 3 (GSK-3) inhibitors:  
Tideglusib,  
TDZD-8,  
DIP-3.18

- Not available

---

Octodrine [27]

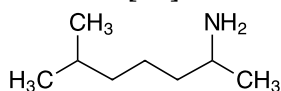

- Small molecule agonist of the estrogen related receptor (ERR) signaling pathway from Tox21 library screening.

---

Amiodarone [28]

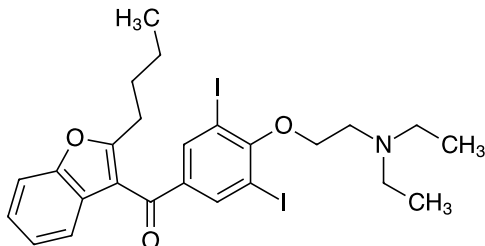

- A class III antiarrhythmic agent possessing antiarrhythmic and vasodilatory activities.
- Blocks the myocardial calcium, potassium and sodium channels, thus resulting in prolongation of the cardiac action potential and refractory period.

---

Thioridazine [29]

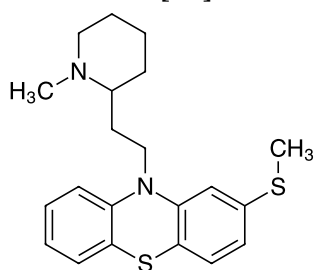

- Binds to dopamine receptors, thus blocking the actions of dopamine or other agonists.

---

Artesunate [30]

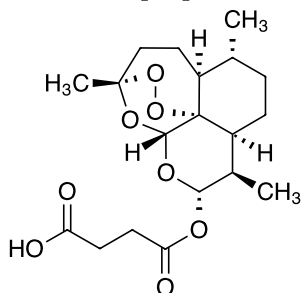

- Anti-malarial, anti-shistosomiasis, antiviral, and potential anti-neoplastic drug.
- Forms reactive oxygen species (ROS) and carbon-centered radicals, which damage parasitic organisms.
- Induces DNA breakage, arrests the cell cycle (G1 and G2/M phases), inhibits cell proliferation, and induces apoptosis via mitochondrial and caspase signal transduction pathways.

---

Hexachlorophene [31]

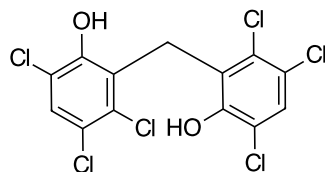

- A chlorinated bisphenol antiseptic agent with bacteriostatic activity.
- Active against gram-positive organisms, (Less effective against gram-negative bacteria).

---

Pyrvinium pamoate [32]

- Anti-parasitic agent (Used therapeutically for treating helminthiasis)

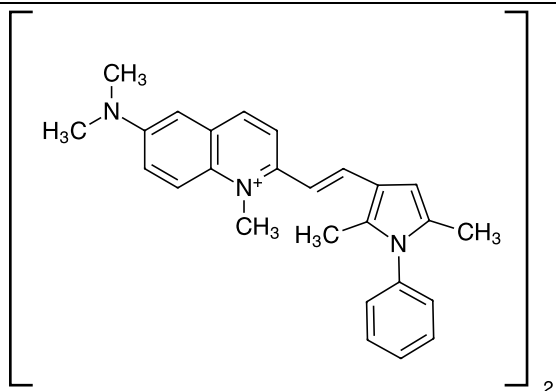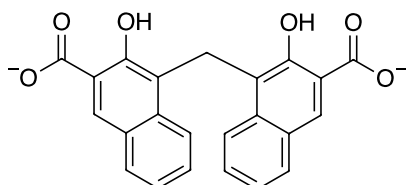

Quinacrine [33]

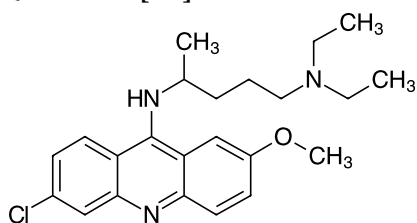

- Potential antineoplastic and antiparasitic agent.
- Inhibits the transcription/activity of nuclear factor-kappaB (NF-kappaB), thus inducing/restoring the expression of tumor suppressor p53, p53-dependent apoptotic pathways, tumor cell apoptosis, etc.

Cyclophosphamide [34]

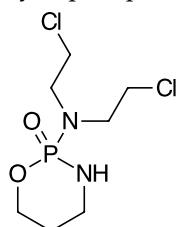

- An alkylating agent possessing antineoplastic and immunosuppressive activities.
- The metabolized product phosphoramidate mustard binds to and crosslinks DNA and RNA, thus resulting in the inhibition of DNA replication and protein synthesis.

Tosedostat [35]

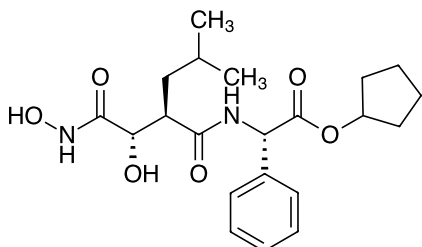

- An inhibitor of aminopeptidases (M1 family) possessing antineoplastic activity.
- Inhibits protein synthesis and enhances cancer cell death via the increase of Noxa (proapoptotic protein) level.

Chloroquine [36]

- An antimalarial, anti-inflammatory drug.
- Inhibits heme polymerase in parasites, thus accumulating toxic heme within the parasitic cell.

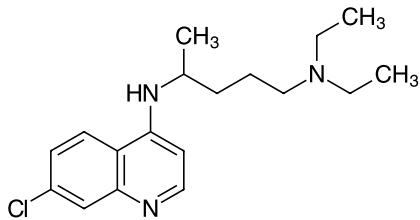

- May interfere with nucleic acid biosynthesis.
- Possesses chemosensitizing and radiosensitizing activities in cancer cell.

---

Aliskiren [37]

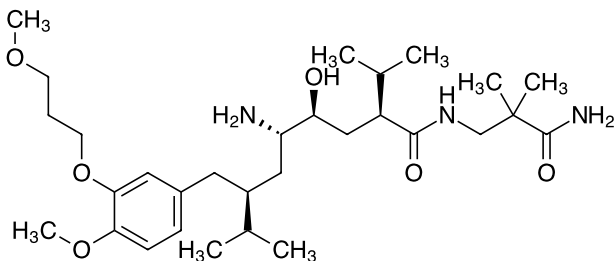

- Non-peptide renin inhibitor with antihypertensive activity.
- Selectively binds to the S3 sub-pocket of renin, thus preventing arterial vasoconstriction and inhibiting aldosterone production.

---

Atorvastatin [38]

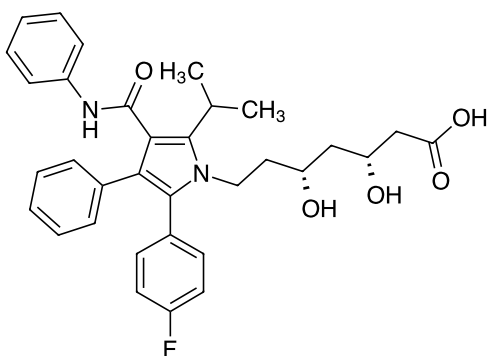

- A lipid-lowering agent.
- Competitively inhibits hepatic hydroxymethyl-glutaryl coenzyme (HMG-CoA) reductase, thus lowers the levels of plasma cholesterol and lipoprotein levels.
- Modulates immune responses.

---

P21-activated protein kinase inhibitor

- Not available
-

**Table S2.** Examples of chemosensitizers targeting antioxidant or cell wall systems in fungi previously determined in the model yeast *Saccharomyces cerevisiae*.<sup>1</sup>

| <b>Compounds</b>                 | <b>Antioxidant targets<sup>5</sup></b> | <b>Cell wall targets<sup>5</sup></b> | <b>References</b> |
|----------------------------------|----------------------------------------|--------------------------------------|-------------------|
| Octyl gallate                    | <i>yap1Δ</i>                           | <i>slt2Δ, bck1Δ</i>                  | [69]              |
| <i>trans</i> -Cinnamaldehyde     | <i>sod1Δ, sod2Δ</i>                    | ND <sup>2</sup>                      | [59]              |
| 2-Hydroxy-5-methoxy-benzaldehyde | <i>sod1Δ, sod2Δ</i>                    | ND <sup>2</sup>                      | [59]              |
| 2-Hydroxy-4-methoxy-benzaldehyde | ND <sup>2</sup>                        | <i>slt2Δ, bck1Δ</i>                  | [70]              |
| 3,5-Dimethoxy-benzaldehyde       | <i>sod1Δ, sod2Δ, glr1Δ</i>             | <i>slt2Δ, bck1Δ</i>                  | [59,70]           |
| 2,5-Dimethoxy-benzaldehyde       | <i>sod1Δ, sod2Δ</i>                    | <i>slt2Δ, bck1Δ</i>                  | [59,70]           |
| 2,3-Dihydroxy-benzaldehyde       | <i>sod1Δ, sod2Δ, glr1Δ</i>             | ND <sup>2</sup>                      | [76]              |
| 4-Methoxybenzoic acid            | ND <sup>2</sup>                        | <i>slt2Δ, bck1Δ</i>                  | [70]              |

<sup>1</sup>Functions of gene products: Sod1, Cytosolic superoxide dismutase; Sod2, Mitochondrial superoxide dismutase; Glr1, Glutathione reductase; Slr2, MAPK of cell wall integrity system; Bck1, MAPKKK of cell wall integrity system.

<sup>2</sup>Not determined
